# Supplementary material for: Years of extraction determines CO 2 and CH 4 emissions from an actively extracted peatland in eastern Québec, Canada
Source: Copernicus journal article supplement (doi:10.5194/bg-2022-156), 2022-08-01
Supplement: Supplementary file [file bg-2022-156-RC1-supplement.pdf]

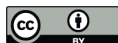

## Years of extraction determine CO<sub>2</sub> and CH<sub>4</sub> emissions from an actively extracted peatland in eastern Québec, Canada

Laura Clark<sup>1</sup>, Ian B. Strachan<sup>2,1</sup>, Maria Strack<sup>3</sup>, Nigel T. Roulet<sup>1</sup>, Klaus-Holger Knorr<sup>4</sup>, Henning Teickner<sup>4</sup>

5 <sup>1</sup>Department of Geography, McGill University, Montreal, H3A 0B9, Canada

<sup>2</sup>Department of Natural Resource Sciences, McGill University, Ste Anne de Bellevue, H9X 2V8, Canada

<sup>3</sup>Department of Geography and Environmental Management, University of Waterloo, Waterloo, N2L 3G1, Canada

<sup>4</sup>Ecohydrology & Biogeochemistry Group, Institute of Landscape Ecology, University of Münster, Heisenbergstr. 2, 48149 Münster, Germany

10

*Correspondence to:* Ian B. Strachan ([ian.strachan@queensu.ca](mailto:ian.strachan@queensu.ca)); Department of Geography and Planning, Queen's University, Kingston, K7L 3N6, Canada

**Abstract.** Draining and extracting peat alters a peatland's control of CO<sub>2</sub> and CH<sub>4</sub> emissions. Carbon (C) emissions from  
15 peatlands undergoing extraction are not well constrained due to a lack of measurements. We determine the effect that  
production duration (years of extraction) has on the CO<sub>2</sub> and CH<sub>4</sub> emissions from an actively extracted peatland over three  
years of measurements (2018-2020). We studied five sectors identified by the year when extraction began (1987, 2007, 2010,  
2013, 2016). Higher average CO<sub>2</sub> and CH<sub>4</sub> emissions were measured from the drainage ditches (CO<sub>2</sub>: 2.05 ± 0.12 g C m<sup>-2</sup> d<sup>-1</sup>;  
CH<sub>4</sub>: 72.0 ± 18.0 mg C m<sup>-2</sup> d<sup>-1</sup>) compared to the field surface (CO<sub>2</sub>: 0.9 ± 0.06 g C m<sup>-2</sup> d<sup>-1</sup>; CH<sub>4</sub>: 9.2 ± 4.0 mg C m<sup>-2</sup> d<sup>-1</sup>)  
20 regardless of sector. For peat fields, CO<sub>2</sub> fluxes were highest in the youngest sector, which opened in 2016 (1.5 ± 0.2 g C m<sup>-2</sup>  
d<sup>-1</sup>). The four older sectors all had similar mean CO<sub>2</sub> fluxes (~0.65 g C m<sup>-2</sup> d<sup>-1</sup>) that were statistically different from the mean  
2016 CO<sub>2</sub> flux. A spatial effect on CO<sub>2</sub> fluxes was observed solely within the 2016 sector, where CO<sub>2</sub> emissions were highest  
from the centre of the peat field and declined towards the drainage ditches. These observations occur due to operators' surface  
contouring to facilitate drainage. The domed shape and subsequent peat removal resulted in a difference in surface peat age  
25 hence different humification and lability. <sup>14</sup>C dating confirmed that the remaining peat contained within the 2016 sector was  
younger than peat within the 2007 sector and that peat age is younger toward the centre of the field in both sectors. Humification  
indices derived from mid-infrared spectrometry (MIRS) (1630/1090 cm<sup>-1</sup>) indicated that peat humification increases with  
increasing years of extraction. Laboratory incubation experiments showed that CO<sub>2</sub> production potentials of surface peat



30 samples from the 2016 sector increased toward the centre of the field and were higher than for samples taken from the 1987  
and 2007 sectors. Our results indicate that peatlands under extraction are a net source of C where emissions are high in the  
first few years after opening a field for extraction and then decline to about half the initial value and remain at this level for  
several decades, and the ditches remain a 2 to 3 times greater source than the fields, but represent < 7% of the total area of a  
field.

## 1 Introduction

### 35 1.1 CO<sub>2</sub> and CH<sub>4</sub> Production in Natural Peatlands

Peatlands are important carbon (C) sequestering ecosystems containing one-third of global soil carbon stores (Limpens et al.,  
2008; Yu, 2012). Generally, peatlands are sinks of carbon dioxide (CO<sub>2</sub>) and sources of methane (CH<sub>4</sub>), although this can vary  
interannually and is dependent on environmental conditions (Bubier et al., 1993; 2003; 2005; Lafleur et al., 2003; Moore et  
al., 1990). Carbon is removed from the atmosphere in the form of CO<sub>2</sub> by surface vegetation via photosynthesis, which is then  
40 stored in peat soils as incompletely decomposed organic matter (Strack et al., 2008). Carbon is released from peatlands as a  
by-product of plant (autotrophic) and soil (heterotrophic) respiration, otherwise known as ecosystem respiration (ER).  
Respiration is, among other factors, dependent on labile C, soil temperature and moisture content (Strack et al., 2008).  
Organisms in the soil break down complex molecules into low-molecular-weight substances, which are oxidized into CO<sub>2</sub>  
(Killham, 1994). Litter decomposition rates decrease over time because the remaining material becomes increasingly difficult  
45 for microbes to break down (Strack et al., 2008). The decomposition rate is influenced by the quantity and quality of peat and  
environmental conditions, including peat moisture, temperature, acidity, and the availability of alternative electron acceptors  
for organic matter oxidation (Killham, 1994). Carbon dioxide production rates indicate peat quality because they describe the  
rate at which microorganisms decompose organic matter. High-quality peat contains large amounts of labile C available to  
decompose (e.g. carbohydrates, proteins, amino acids), leading to higher rates of CO<sub>2</sub> production (Schlesinger & Andrews,  
50 2000; Wardle et al., 2004). Decomposition rates are the largest in the youngest peat and have been found to decrease with peat  
age (Hogg, 1992).



Controlled by peat water saturation and microbial activity, CH<sub>4</sub> emissions from peatlands are spatially and temporally variable (Moore et al., 1990; 1994; Roulet et al., 1997). Methane is produced in the anoxic layers of peatlands via methanogenesis (Lafleur, 2009; Yavitt and Seidmann-Zager, 2006) and can be consumed in the oxic peat layers through a process known as methanotrophy (Turetsky et al., 2014). The greater the oxic layer thickness, the greater the opportunity for CH<sub>4</sub> oxidation, typically occurring within 25 cm of the oxic-anoxic boundary (Segers, 1998). Methane produced in the peat is released into the atmosphere through diffusion, ebullition, or plant-mediated transport via root tissue (Holden, 2005; Rosenberry et al., 2003; Whalen, 2005).

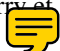

## 1.2 Peatland Disturbance

Peat extraction intrinsically alters the C exchange dynamics of a peatland. In preparation for extraction, a peatland is drained by cutting ditches to lower the water table (WT), and all vegetation is removed. When the surface peat is sufficiently dry, vacuum harvesters begin to extract a thin layer of surface peat. Following the end of extraction activities, peatlands disturbed by vacuum harvesting in this manner are often unable to naturally revegetate and regain their original ecosystem functions because the viable seed bank is primarily removed during extraction (Waddington et al., 2009).

If left unrestored, drained peatlands act as large sources of C to the atmosphere (Hirashi et al., 2014; Joosten et al., 2002; McNeil & Waddington, 2003; Rankin et al., 2018; Smith et al., 2014; Waddington et al., 2002). Drainage lowers the WT, creating a thicker oxic layer of peat (Abdalla et al., 2016; Waddington et al., 2009). This results in higher respiration rates and increases the volume within which CH<sub>4</sub> oxidation can occur (Abdalla et al., 2016; Holden, 2005; Sundh et al., 2000; Turetsky et al., 2014). Therefore, while CO<sub>2</sub> emissions to the atmosphere rise, CH<sub>4</sub> emissions are decreased by an average of 84% (Abdalla et al., 2016). Methane emissions become localized in the former drainage ditches that can become new anoxic zones due to the saturated conditions, warm temperatures, and large amounts of labile C normally found in these areas (Rankin et al., 2018; Schrier-Ujjil et al., 2010; Sundh et al., 2000; Waddington & Day, 2007; Waddington et al., 2009).

Carbon emissions and controls on C exchange from undisturbed peatlands have been well-documented and researched (e.g. Bubier et al., 1993; 2003; 2005; Lafleur et al., 2003; Moore et al., 1990; Pelletier et al., 2007; 2011; Roulet et al., 2007; Strachan et al., 2016; Updegraff et al., 1995; Valentine et al., 1994). Post-extracted, unrestored peatlands are persistent sources



of C to the atmosphere (Rankin et al., 2018); however, restoration can successfully revert disturbed peatlands from net C sources to net C sinks as a result of increased vegetative uptake of CO<sub>2</sub> (Nugent et al., 2018; Strack & Zuback, 2013). Until recently, research has focused on understanding the impacts of disturbance on the gas exchange after the disturbance has ended or has been conducted on sites where extraction has been halted (Ahlholm and Silvola, 1990; Aslan-Sungur et al., 2016; 80 Bergman et al., 1998; Nykanen et al., 1995; Oleszczuk et al., 2008; Sundh et al., 2000; Waddington and Price, 2000; Waddington et al., 2002; Wilson et al., 2015). To our knowledge, this is the first study conducted in a drained peatland undergoing active vacuum extraction. Thus, little is currently known about how C emissions from vacuum-harvested peatlands are altered during the active extraction process. This study aims to quantify the CO<sub>2</sub> and CH<sub>4</sub> emissions from a peatland undergoing active extraction and to link this with peat quality and environmental factors to better understand how C exchange 85 changes over time.

## 2 Materials and Methods

### 2.1 Site Description

*In situ* fluxes of CO<sub>2</sub> and CH<sub>4</sub> were measured at an active horticultural peat production site approximately five km southeast of Rivière-du-Loup, QC (47.47°N, 69.31°W). Initially a treed ombrotrophic bog system, this location was prepared for peat 90 extraction in 1985, using standard industry methods resulting in drained peat devoid of vegetation. The bare peat is sectioned into individual "fields" 500 m in length and 30 m in width via drainage ditches. These individual fields are combined into "sectors" classified by the year peat extraction began (Figure 1). In eastern Canadian peat production sites, each field is domed; the elevation of the middle of the field is highest and slopes down toward the drainage ditches to assist in precipitation drainage. A gravel service road approximately 1 km in length runs down the middle of the site, separating the peatland into two halves. 95 Large piles of loose peat and wood debris removed from the surface of the fields are stored on either side of this main road, between the gravel and the beginning of the individual fields. The storage piles are continuously moved and resized to transport the peat to a handling facility or to form new peat piles to prevent overheating and combustion. The site has been in operation for 36 years and was undergoing active extraction at the time of this study. Large machinery such as tractors and vacuum harvesters frequently drove over the surface of the fields during the measurement period. Measurements were taken from



100 fifteen fields, each with an area of 0.015 ha<sup>2</sup>. Measurements were taken over three years in August 2018, June through August 2019, and July through September 2020.

The climate of the study area is cool-temperate with a mean annual temperature of 3.5 °C and mean precipitation of 963.6 mm period 1981 – 2010; Environment and Climate Change Canada, 2021). The normal mean temperatures for June, July, and August, are 14.9, 17.6, and 16.7 °C, respectively (Environment and Climate Change Canada, 2021). The 105 corresponding mean precipitation values are 92.6, 95.0, and 94.2 mm, respectively (Environment and Climate Change Canada, 2021).

## 2.2 Chamber Measurements

The closed chamber method (discussed in detail in Rankin et al. 2018) was used to measure fluxes of CO<sub>2</sub> and CH<sub>4</sub> 110 from the peat surface. Fluxes of CO<sub>2</sub> and CH<sub>4</sub> were measured from five different sectors at this site, representing production beginning in 1987, 2007, 2010, 2013, and 2016 (Figure 1). Within these sectors, random measurements were taken from five transects 50 m apart perpendicular to the lateral drainage ditches, alternating across three consecutive fields (Figure 2a). Each transect contained four measurement locations: 0 (representing in the ditch itself), and 2, 5, and 15 m (field centre) away from the drainage ditch, thus capturing spatial variability in the fluxes across the field (Figure 2b). To optimize coordination of 115 sampling with the field operations, the 1987 (oldest) sector age was under-sampled relative to the other four sectors in 2020 because previous measurements indicated that this sector had CO<sub>2</sub> and CH<sub>4</sub> flux values similar to other fields, except the most recently open field (2016).

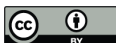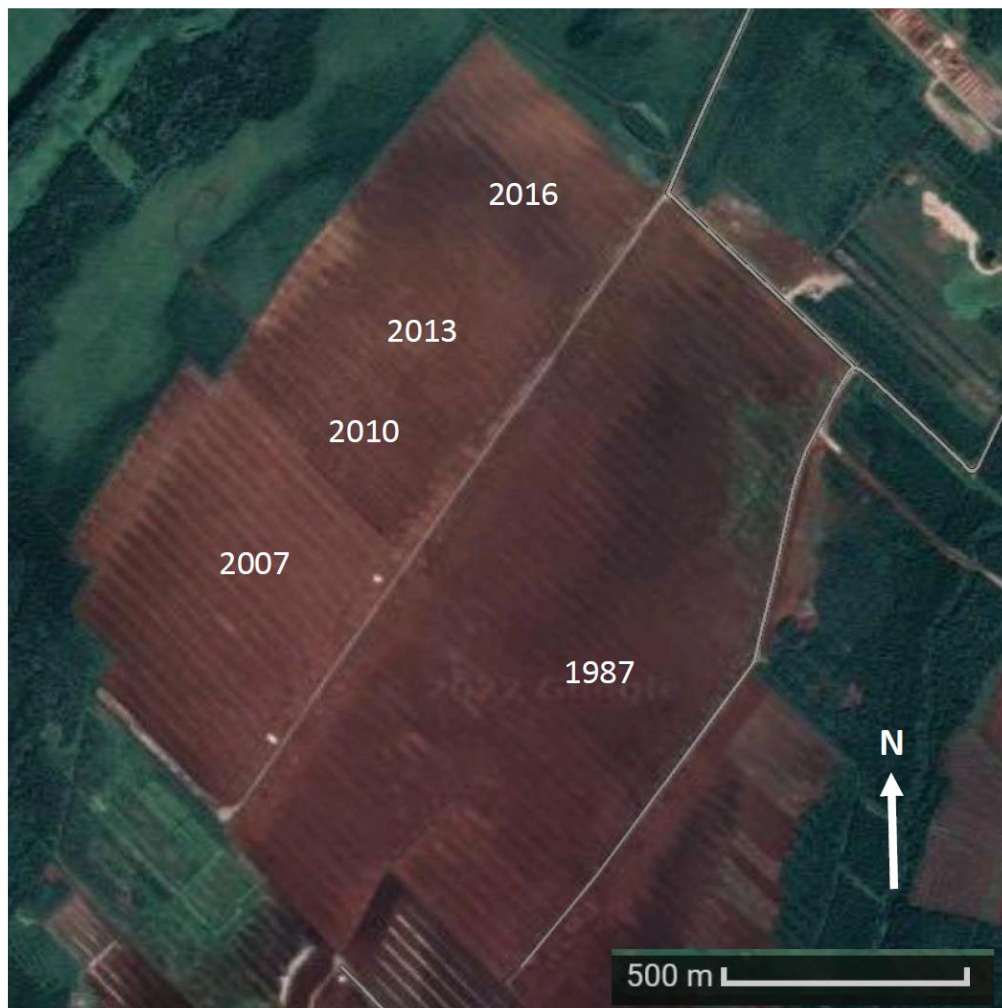

120 **Figure 1: Location of measured sectors within the study site. Image modified from © Google Maps (Imagery ©2022 CNES/Aribus, Imagery©2022 CNES/Airbus, Landsat, Copernicus, Maxar Technologies, Map data© 2022) (<https://www.google.ca/maps/@47.7910172,-69.5156644,3144m/data=!3m1!1e3!5m1!1e4>), accessed July 6, 2022). The field labels for the year the sectors were opened for peat extraction. Since the first measurements began in 2018, the 2016, 2013, 2010, 2007 and 1987 sectors represent 2, 5, 8, 11, and 31 years respectively.**

125

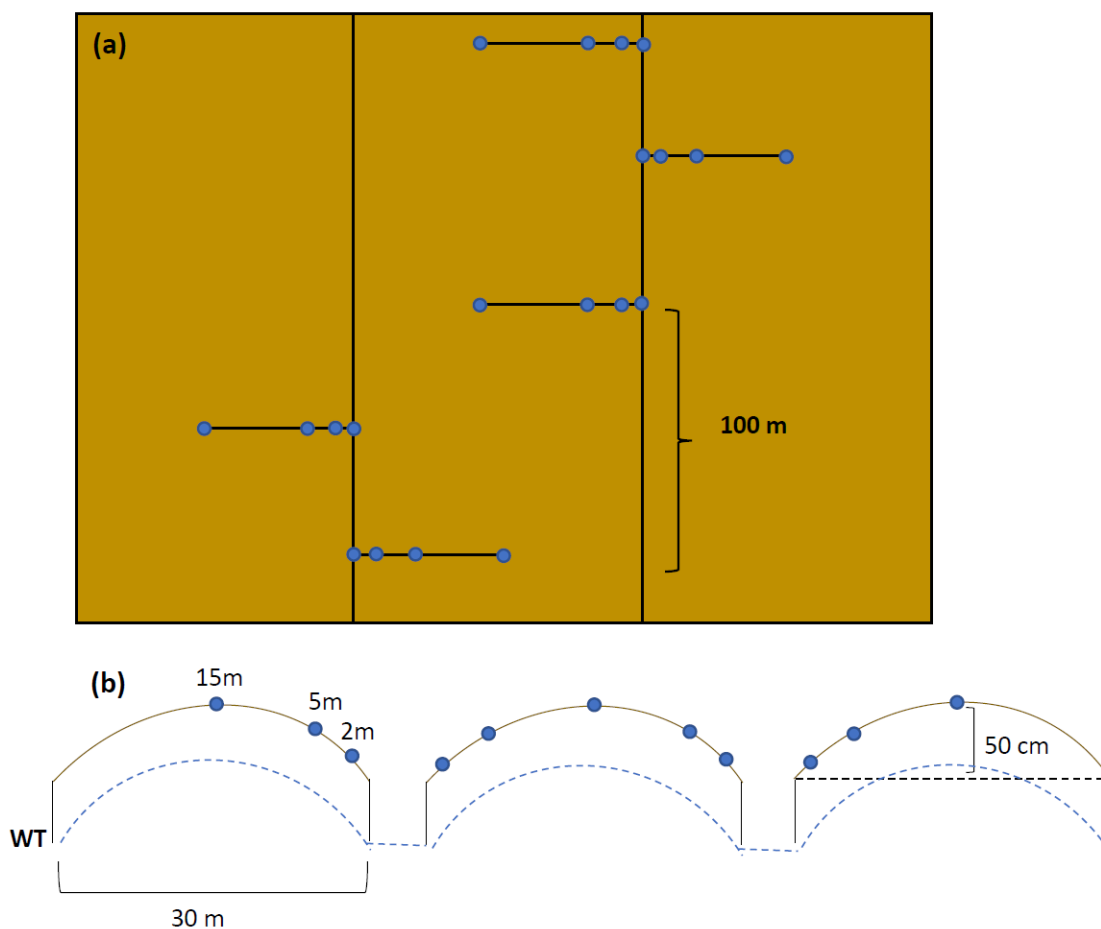

**Figure 2: (a) Sampling transects and (b) measurement locations within transects with an estimated elevation increase at the field centre.**

130

Collars could not be left in place between measurements because we were measuring from active peat extraction fields that had harvest machinery driving on them. Therefore, at each measurement location on the peat field, a metal collar was inserted approximately 5 cm into the surface of the field. An opaque aluminum chamber (64 x 64 cm) was then placed on top of the collar. Air was cycled between the chamber and a trace gas analyzer. In 2018, a PP Systems EGM-4 IRGA was used. In the first two weeks of measurements in 2019 a Los Gatos Research Ultrortable Greenhouse Gas Analyzer was used in the remainder of 2019 and in 2020, a LI-COR Biosciences LI-7810 Trace Gas Analyzer was used. A one-way ANOVA ( $\alpha = 0.05$ ) was conducted between the fluxes from the different analyzers for the 2016 sector 2 m position and 2007 sector 15 m position.

135



There were no significant differences between the means of the fluxes measured with the three analyzers from the 2016 ( $p = 0.552$ ,  $F_{2,85} = 0.599$ ) or 2007 ( $p = 0.06$ ,  $F_{2,87} = 2.848$ ) sectors. A measurement lasted four minutes, after which the chamber was  
140 lifted for a minimum of 30 seconds to allow the  $\text{CO}_2$  and  $\text{CH}_4$  to return to ambient concentrations. The measurements taken in the drainage ditches required a different chamber because the ditches were too narrow to accommodate the field chamber. The ditch chamber was cylindrical (35 cm in height, 27 cm diameter) and was composed of translucent plastic covered in opaque reflective tape. The same measurement procedure was followed for the ditch measurements. A battery-powered fan was installed on the interior of each of the field and ditch chambers to ensure adequate air mixing during measurements. The  
145 chamber and collar were removed from the field after each measurement was completed and moved between measurement locations.

The interior height of the field chamber above the peat surface, including the collar, was measured at all four corners at each sampling location. The height of the ditch chamber, including the collar, was measured at three different points around the perimeter. Peat volumetric water content (% VWC) was measured at three separate locations at each measurement location  
150 using a CSI Hydrosense II soil moisture sensor inserted from 0 to -10 cm. Peat temperature was taken at depths of 2, 5, 10, 15, and 20 cm below the surface to attain a temperature profile at each measurement location.

### 2.2.1 Data Analysis and Chamber Flux Calculation

~~The measured concentrations of  $\text{CO}_2$  and  $\text{CH}_4$  were stored in the internal memory of the gas analyzers and downloaded~~  
155 ~~to a computer at the end of each sampling day.~~ Trace gas flux in  $\text{mg m}^{-2} \text{d}^{-1}$  was determined as the change in concentration over time using the equation

$$F = \frac{f_x \left( \frac{V_c}{R(273+T_a)} \right) n \cdot t}{S} \quad (1)$$

where  $f_x$  is the rate ( $\text{ppmv min}^{-1}$ ),  $V_c$  is the chamber volume ( $\text{m}^3$ ),  $R$  is the ideal gas constant ( $0.0821 \text{ L atm K}^{-1} \text{ mol}^{-1}$ ),  $T_a$  is the air temperature ( $^{\circ}\text{C}$ ),  $n$  is the molecular mass of each gas ( $\text{CO}_2 = 0.044 \text{ kg mol}^{-1}$ ;  $\text{CH}_4 = 0.016 \text{ kg mol}^{-1}$ ),  $S$  is the surface area  
160 of the collar ( $\text{m}^2$ ), and  $t$  is the number of minutes in a day (1440 minutes). Change in concentration over time for both  $\text{CO}_2$  and  $\text{CH}_4$  were plotted for each measurement location, and the flux was kept if a linear increase or decrease was observed to ensure





that low values were not disproportionately discarded. In 2018, 49% of CO<sub>2</sub> and 55% of CH<sub>4</sub> measurements were rejected. In 2019, 21.8% of CO<sub>2</sub> and 26% of CH<sub>4</sub> measurements were rejected, and in 2020, 11.6% of CO<sub>2</sub> and 37.6% of CH<sub>4</sub> measurements were rejected.

165 All statistical analyses were performed in the R software package (R Core Team, 2021), and figures were produced using the R package ggplot2 (Wickham, 2016). A one-way ANOVA of CO<sub>2</sub> and CH<sub>4</sub> fluxes between the field surface and drainage ditches was performed, and a two-way ANOVA between sector age and measurement position was performed, excluding drainage ditch measurements, with  $\alpha = 0.05$ . An interaction test was conducted to determine the relationship between sector age and measurement position and a Tukey post-hoc test was conducted to show the specific interactions. Linear  
170 regressions were performed between surface VWC, temperature measurements, and CO<sub>2</sub>/CH<sub>4</sub> flux.

## 2.3 Peat Incubation

### 2.3.1 Field sampling

In order to investigate differences in peat substrate quality among sectors and field positions, incubations were performed with peat samples taken from the 1987, 2007, and 2016 sectors, spanning the largest number of production ages  
175 available at the research site. Samples were taken at the second chamber measurement transect from each of the three-sector ages (Figure 2a). Within each transect, approximately 1 kg of peat was obtained at 2, 5, and 15 m away from the drainage ditches both from the surface and from a depth of 10 cm. Additional samples were taken from a depth of 50 cm, at a distance of 2 m from the ditch and from a depth of 80 cm, 15 m away from the ditch (Figure 3). The 50 and 80 cm positions were estimated to be parallel at depth, based on an elevation difference of approximately 50 cm resulting from the field doming.  
180 Samples were kept in sealed plastic bags during transport from the field and frozen upon arrival at the lab. Four samples (Figure 3) were taken from both the 2007 and 2016 sectors for <sup>14</sup>C dating performed by a 3MV accelerator mass spectrometer (AMS) at the AEL AMS Laboratory at the University of Ottawa. After physical and chemical pre-treatments, the samples were combusted, producing CO<sub>2</sub> for graphitization (<https://ams.uottawa.ca/analytical-methods-radiocarbon-laboratory/>). Carbon dating was calibrated using the OxCal .4.4 (Bronk, 2009) and IntCal 2020 (Reimer et al., 2020) curves.

185

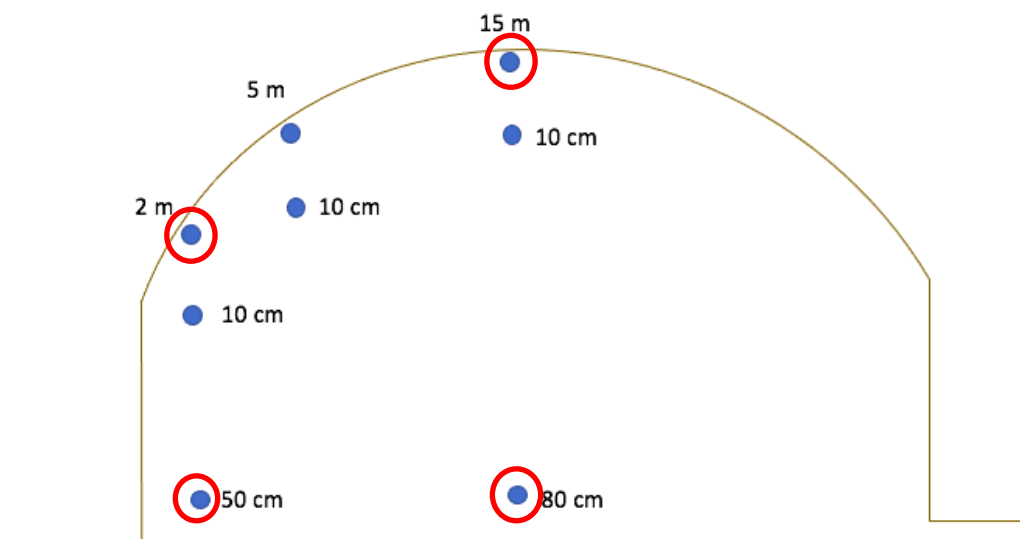

**Figure 3: Sampling locations and depths from the 1987, 2007, and 2016 sectors. Those with red circles were also sampled for  $^{14}\text{C}$  dating at the 2007 and 2016 sectors.**

### 190 2.3.2 Incubation Experiment Methodology and Analysis

Incubations were performed in 250 mL mason jars fit with air-tight lids and a short plastic tube fixed with a stopcock valve, sealed with epoxy. Nine replicates and an additional blank were used for each sampling position. 30 g of peat was weighed and placed into each jar after woody debris were removed. To keep moisture conditions between the samples similar, 30 mL of distilled water was added to the jars and mixed with the peat to create a slurry. This is not meant to represent field conditions but to obtain rates reflecting potential, standardized decomposability/respiration rates. The estimated VWC of the slurries was 80 – 90%. The height and diameter of peat in the jar was recorded to calculate the headspace volume for each sample. Jars were kept at a constant temperature of 23 °C.

5 mL of the headspace from the jars were sampled at 0, 6, 12, 24, 48, and 72 hours. After the initial 72-hour samples were taken, the lids were removed, the jars were left open for 12 hours, resealed, and sampling was repeated for an additional 72 hours. This was done to account for increased respiration rates that may have occurred during the first sampling period



from cellular rupture after the samples were thawed. 5 mL of ambient air was backfilled into each jar after each sample was taken.

The concentrations of the gas samples were analyzed using two gas chromatographs (GC) (Shimadzu 2014 GHG GC & SRI 8610 C GHG GC). The carrier gas was N<sub>2</sub>, the SRI column temperature was 70°C and the flame ionization detector (FID) was at 110°C. Three standards of 5000 ppm CO<sub>2</sub> and 5 ppm CH<sub>4</sub> were run through the GC before injecting the 5 mL gas samples at each sampling interval. Gas samples were analyzed within six hours of withdrawal from the jars. Samples were consistently run on the same GC throughout the course of the experiment. Gas concentrations from fifteen samples of ambient air were run on both GCs and were compared every 72 hours throughout the course of the experiment to cross calibrate between the readings of the two machines. The Shimadzu 2014 GHG GC had an average ( $\pm$  SD) ambient CO<sub>2</sub> reading of 609.2 ppm ( $\pm$  152.0) and the SRI 8610 C GHG GC had an average ambient CO<sub>2</sub> reading of 589.5 ( $\pm$  132.6) ppm. CO<sub>2</sub> and CH<sub>4</sub> concentrations were corrected for dilution from backfilling of ambient air and for variation in ambient concentrations of CO<sub>2</sub> and CH<sub>4</sub> using the blank measurements. CO<sub>2</sub> and CH<sub>4</sub> production were calculated as a change in concentration over time. 10% of data was discarded after quality control, where values with  $r^2 < 0.8$  were rejected. A three-way ANOVA was used to determine the variance of means between sector age, position, and depth.

215

## 2.4 Peat Quality Analysis

Samples were prepared for Fourier transform mid-infrared (FT-MIR) spectrometry corresponding to the sampling locations used in the peat incubations. All samples were oven-dried at 60 °C for 48 hours and ground into a fine powder using a mortar and pestle, after which they were run through a 50  $\mu$ m mesh sieve. Once prepared, the samples were analyzed using FTIR spectroscopy (Agilent Cary 660 FTIR spectrometer; 32 scans per spectrum, 2 cm<sup>-1</sup> resolution). To this end, a mixture of approximately 2 mg sample and 200 mg potassium bromide (KBr) (FTIR grade, Sigma Aldrich, St. Louis, MO, USA) were pressed. A KBr background spectrum was subtracted from the raw absorbance spectra. Finally, the spectra were baseline corrected (Beleites and Sergo, 2020: <https://github.com/cbeleites/hyperSpec>) using the R package *ir* (Teickner, 2020: <https://github.com/henningte/ir>) and further processed with the R package ‘*irpeat*’ (Teickner & Hodgkins, 2021). A Humification index (HI) was computed as ratio of the absorbances at  $\sim$ 1650 cm<sup>-1</sup> (indicative of lignins and other aromatics)

225

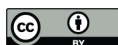

and  $\sim 1090 \text{ cm}^{-1}$  (indicative of polysaccharides representing the labile fraction), as described in detail in Broder et al. (2012). Larger ratios ( $1650/1090 \text{ cm}^{-1}$ ) indicate a greater degree of humification, assuming a residual enrichment of refractory moieties and preferential degradation of more labile fractions (Broder et al. (2012)).

### 3. Results

#### 230 3.1 CO<sub>2</sub> Fluxes

##### 3.1.1 Fields and Drainage Ditches

The average ( $\pm$  SD) CO<sub>2</sub> flux from all sectors, field locations and ditches combined was  $1.2 (\pm 2.1) \text{ g C m}^{-2} \text{ d}^{-1}$ . The mean CO<sub>2</sub> flux from all fields combining all sector ages and excluding the drainage ditch measurements was  $0.9 (\pm 1.6) \text{ g C m}^{-2} \text{ d}^{-1}$ . The mean CO<sub>2</sub> flux from the drainage ditches across all sectors was  $2.05 (\pm 2.2) \text{ g C m}^{-2} \text{ d}^{-1}$ . A significant difference  
235 was present ( $F_{1,1272} = 79.47, p < 2 \times 10^{-16}$ ) between the CO<sub>2</sub> emissions from the drainage ditches and the field surface.

The base of the drainage ditches was closer to the WT than the surface of the fields and, as a result, was frequently saturated. The C cycling dynamics within the ditches are different than those at the surface of the field and thus, the results from the drainage ditches will not be directly compared to those from the field surface.

##### 3.1.2 Sectors

240 The average ( $\pm$  SD) CO<sub>2</sub> flux from all locations within the 1987, 2007, 2010, 2013, and 2016 sectors, excluding the drainage ditch measurements, were  $0.6 (\pm 0.7)$ ,  $0.7 (\pm 0.5)$ ,  $0.6 (\pm 0.4)$ ,  $0.7 (\pm 0.4)$ , and  $1.5 (\pm 2.7) \text{ g C m}^{-2} \text{ d}^{-1}$ , respectively (Figure 4 and 5). The highest measured flux was  $37.1 \text{ g C m}^{-2} \text{ d}^{-1}$  and the lowest measured flux was  $-0.3 \text{ g C m}^{-2} \text{ d}^{-1}$ . A single value of  $-36.5 \text{ g C m}^{-2} \text{ d}^{-1}$  was deemed to be an outlier and removed from the 1987 sector flux data. A two-way ANOVA between sector age and measurement position was performed and the outcomes for sector age and measurement position, as well as any  
245 interactions, will be discussed separately in the following sections. The two-way ANOVA showed that the 2016 sector had significantly higher CO<sub>2</sub> emissions than all other sectors ( $F_{4,942} = 12.80, p < 0.05$ ). The 1987, 2007, 2010, and 2013 sectors exhibited similar fluxes over time, with no significant difference between their means, although the 2010 and 2013 sectors were only measured in 2020.

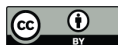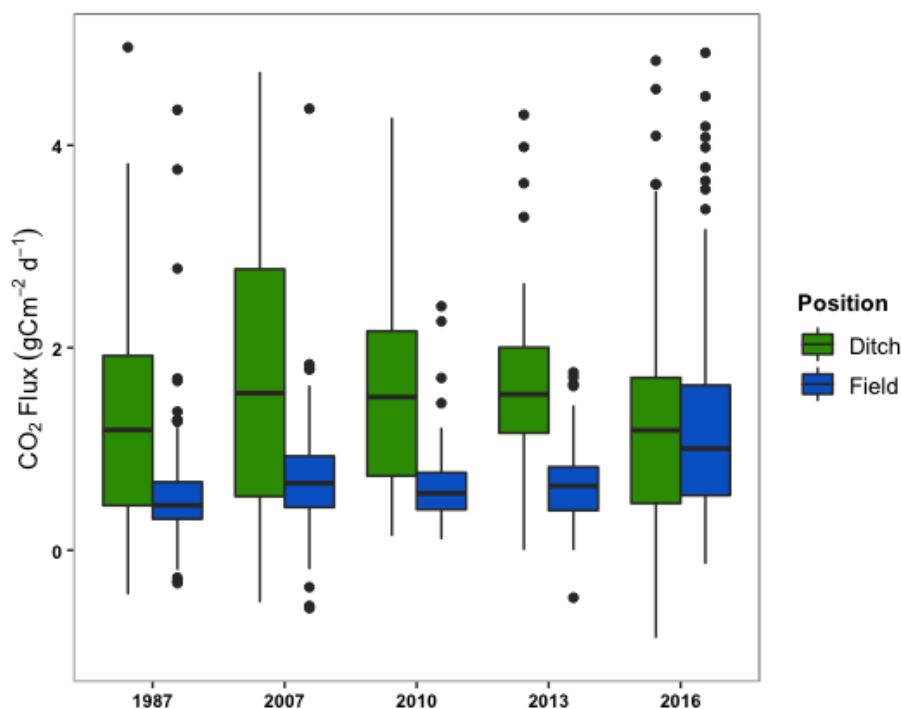

250

**Figure 4:** The box and whisker plots (median, upper and lower quartiles, and outliers) of CO<sub>2</sub> fluxes from the drainage ditch and the three filed locations combined (2, 5 and 15 m) by the year a sector was opened.

### 3.1.3 Measurement Positions Within Fields

255

When measurements are averaged by field position (2, 5, and 15 m away from the drainage ditches) across all five sectors, the mean CO<sub>2</sub> fluxes ( $\pm$  SD) were 0.7 ( $\pm$  0.7), 0.9 ( $\pm$  1.0), and 1.2 ( $\pm$  2.4) g C m<sup>-2</sup> d<sup>-1</sup>, respectively (Figure 5). A statistically significantly different mean CO<sub>2</sub> flux from the 15 m position compared to both the 2 m and the 5 m positions ( $F_{2,942} = 6.90$ ,  $p < 0.05$ ) was found.

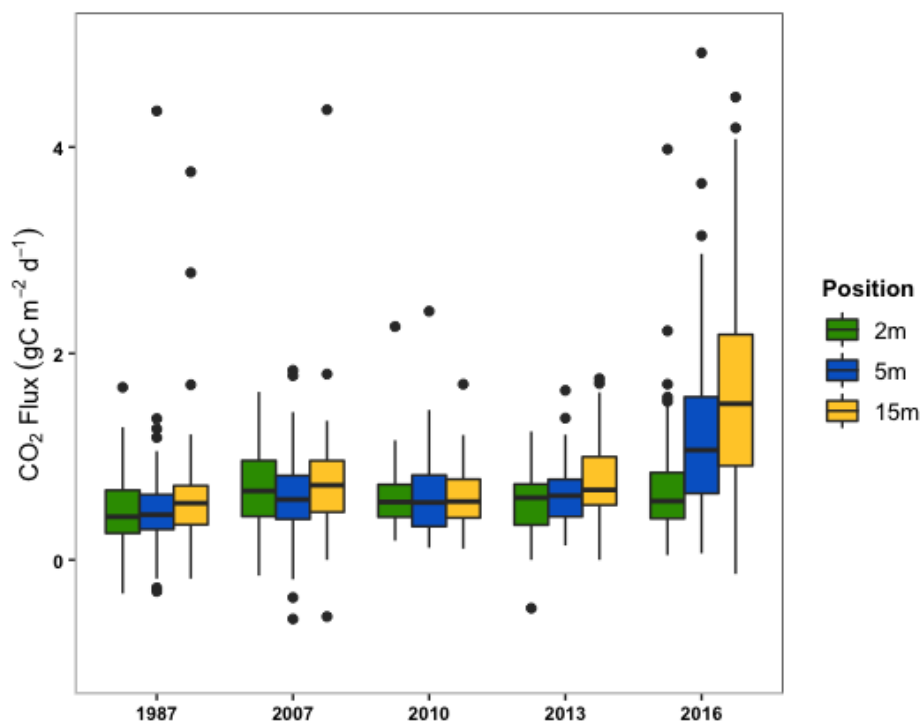

260

**Figure 5: The box and whisker plots of CO<sub>2</sub> flux by sector and measurement location from the edge of the ditches in a field (i.e. 2, 5 and 15 m).**

### 3.1.4 Spatial Variation Within Fields and Between Sectors

265

CO<sub>2</sub> emissions at different distances from the ditches differed for different age sectors,  $F_{8,942} = 3.41$ ,  $p < 0.001$ ). The mean CO<sub>2</sub> emissions from the 15 m position in the 2016 sector significantly differed from every other sampling position and sector. Within the 2016 sector, the means of the CO<sub>2</sub> emissions from the 15 m position were statistically different from those of the 2 m position ( $F_{8,942} = 2.22$ ,  $p < 0.001$ ). No statistical difference emerged between the means of 2016 15 m and 2016 5 m positions. Within the 2016 sector, a difference was only found between the middle and edge of the fields. No differences were noted within or between the other four sectors. Across the whole data set, there was no correlation between VWC ( $r = -0.2$ ) or temperature ( $r = 0.19$ ) and CO<sub>2</sub> flux.

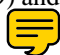

270



### 3.2 CH<sub>4</sub> Fluxes

#### 3.2.1 Fields and Drainage Ditches

Variation in CH<sub>4</sub> emissions was more significant than that of CO<sub>2</sub> between the field and drainage ditches. The mean  
275 CH<sub>4</sub> flux ( $\pm$  SD) from the drainage ditches in all sectors was 84.2 ( $\pm$  325.4) mg C m<sup>-2</sup> d<sup>-1</sup>. The mean CH<sub>4</sub> flux ( $\pm$  SD) from the  
total field surface was 9.2 ( $\pm$  103.0) mg C m<sup>-2</sup> d<sup>-1</sup>. The maximum CH<sub>4</sub> flux from the fields and ditches were 2518.5 and 2737.8  
mg C m<sup>-2</sup> d<sup>-1</sup>, respectively, and the minimum fluxes were -74.7 and -5.8 mg C m<sup>-2</sup> d<sup>-1</sup>, respectively. A single value of 10822  
mg C m<sup>-2</sup> d<sup>-1</sup> was deemed an outlier and removed from the 2016 drainage ditch flux data.

Drainage ditches were much larger sources of CH<sub>4</sub> to the atmosphere than the exposed peat at the field surface (Figure  
280 6). A high standard error was present in both the field and the drainage ditch measurements, although the drainage ditches  
showed more variation. The mean CH<sub>4</sub> emissions from the drainage ditches were statistically higher than that of the fields  
( $F_{1,905} = 15.6$ ,  $p < 0.001$ ).

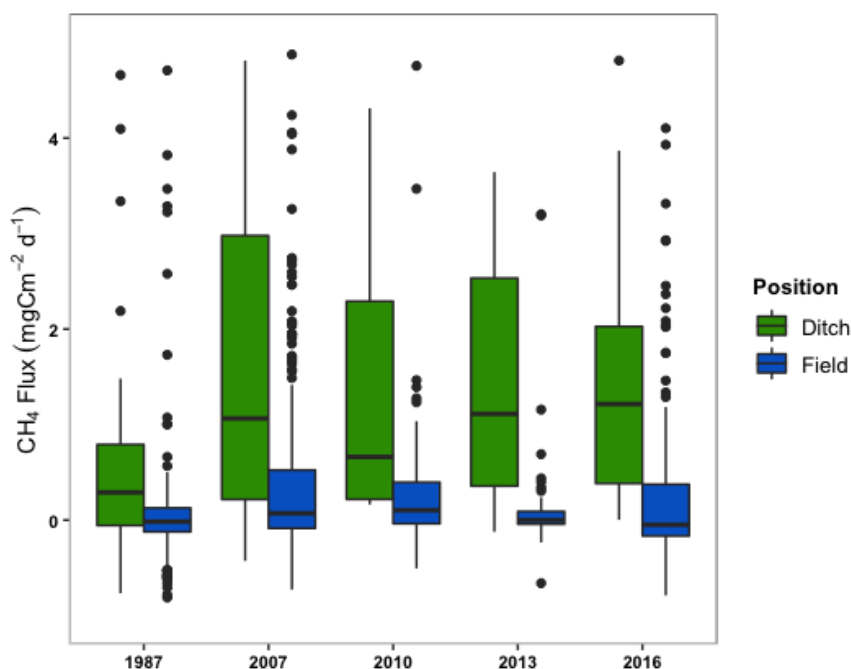

285 **Figure 6: The box and whisker plots of the CH<sub>4</sub> fluxes from drainage ditches and all locations from field surface according to the age of the sector.**



### 3.2.2 Sectors

The average CH<sub>4</sub> flux (± SD) from the drainage ditches from each sector was 32.9 (± 155.0), 113.6 (± 421.0), 46.7 (± 58.4), 14.3 (± 54.7), and 128.4 (± 398.6) mg C m<sup>-2</sup> d<sup>-1</sup> from the 1987, 2007, 2010, 2013, and 2016 sectors, respectively. The average CH<sub>4</sub> flux (± SD) from the field surface was 2.4 (± 26.9), 5.0 (± 22.6), 11.7 (± 61.3), 2.0 (± 13.6), and 21.9 (± 195.9) mg C m<sup>-2</sup> d<sup>-1</sup> from the 1987, 2007, 2010, 2013, and 2016 sectors respectively. None of the sectors were statistically different from each other.

### 3.2.3 Spatial Variation Within Fields and Between Sectors

Combining the sectors and stratifying data by measurement position, the average (± SD) CH<sub>4</sub> fluxes from the 2, 5, and 15 m positions on the fields were 13.4 (± 167.8), 8.5 (± 45.9), and 5.3 (± 33.4) mg C m<sup>-2</sup> d<sup>-1</sup>, respectively. Lower CH<sub>4</sub> emissions were seen mid-field, but there were no statistically significant differences between the means of the three field measurement positions (Figure 7). Across the whole data set, no relationship was found between VWC (r = -0.077) or temperature (r = 0.084) and CH<sub>4</sub>



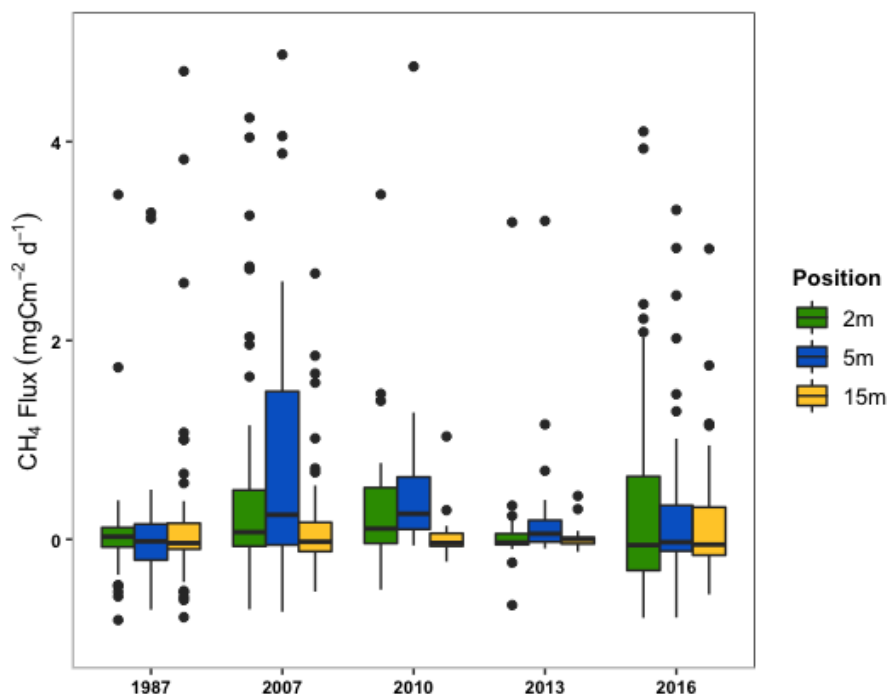

300

Figure 7: Box and whisker plots of the CH<sub>4</sub> flux by measurement distance from the ditch within each age sector.

### 3.3 Peat Age and Quality

The <sup>14</sup>C dating results of peat samples from the 2007 and 2016 sectors revealed distinct differences in peat age across  
305 and within sectors (Figure 8). The elevation difference across the field introduced an age difference between the peat closest  
to the drainage ditches and the peat at the center. The results indicated that peat age ( $\Delta^{14}\text{C}$ ) decreased toward the centre of the  
field, with elevation, in both the 2007 ( $-163.46 \pm 3.27\text{‰}$  and  $-104.10 \pm 3.54\text{‰}$  for 2 and 15 m, respectively) and 2016 ( $-94.06$   
 $\pm 3.56\text{‰}$  and  $30.03 \pm 4.00\text{‰}$  for 2 and 15 m, respectively) sectors. Mid-field, at a depth of 80 cm from the surface, the age  
310 difference was also apparent between sectors ( $-276.62 \pm 2.88\text{‰}$  and  $-154.39 \pm 3.29\text{‰}$  from the 2007 and 2016 sectors,  
respectively) (Figure 8).

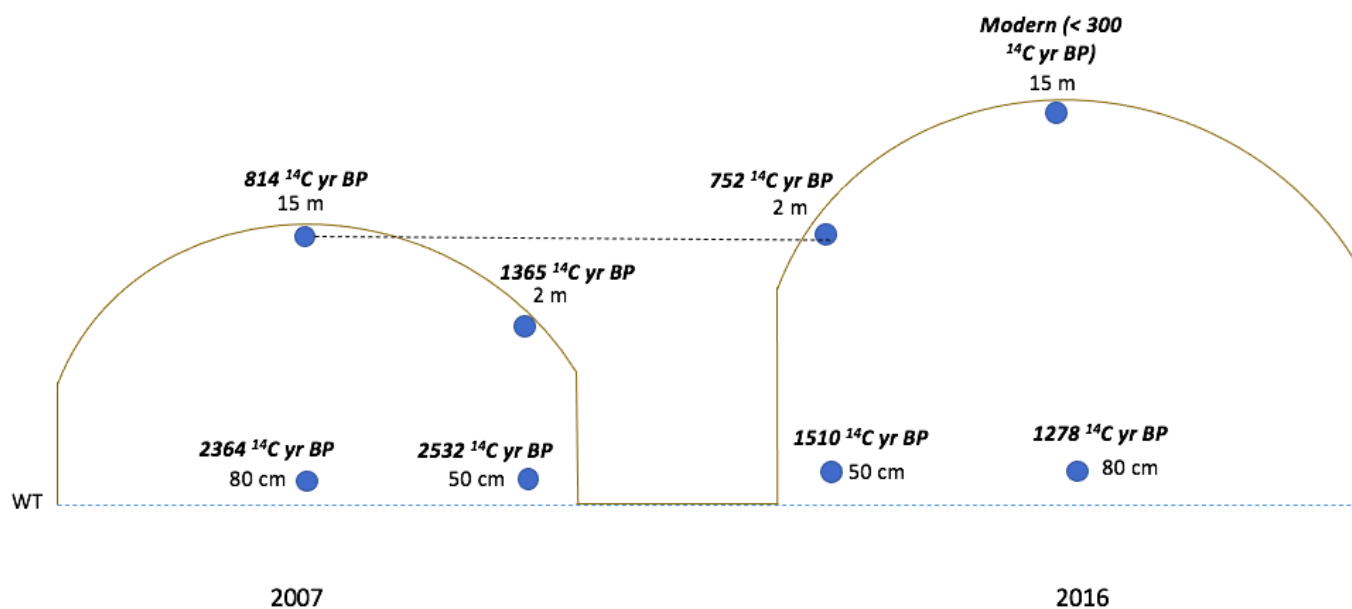

**Figure 8: Incubation sampling locations with respective <sup>14</sup>C ages, all depths approximate**

FT-MIR analysis results indicated that the humification degree increased with years of extraction. Assessing samples from the surface and 10 cm depths, the sector average HI ( $\pm$  SD) were 1.05 ( $\pm$  0.08), 0.82 ( $\pm$  0.08), and 0.70 ( $\pm$  0.09) from the 1987, 2007, and 2016 sectors, respectively. The 50 and 80 cm samples were excluded from this analysis because the deep samples were older and more humified than the surface peat as a result of their depth in the profile. A one-way ANOVA demonstrated that there was a significant difference between the average HI from the 1987 and 2007 sectors ( $F_{(2,21)} = 26.73$ ,  $p < 0.001$ ) and from the 1987 and 2016 sectors ( $F_{(2,21)} = 26.73$ ,  $p < 0.001$ ).

### 3.4 Production Potential

#### 3.4.1 CO<sub>2</sub>

Carbon dioxide production potentials ranged from 0.50 – 1.39, 0.28 – 0.88, and 0.40 – 1.36  $\mu\text{g CO}_2 \text{ g}^{-1} \text{ h}^{-1}$  from the 1987, 2007, and 2016 sectors, respectively. The highest CO<sub>2</sub> production potential came from the 1987 sector at the 2 m position, 50 cm depth (1.39  $\mu\text{g CO}_2 \text{ g}^{-1} \text{ h}^{-1}$ ), while the smallest was observed from the 2007 sector at the 5 m position, 10 cm depth (0.28



325  $\mu\text{g CO}_2 \text{ g}^{-1} \text{ h}^{-1}$ ). The average ( $\pm$  SD) production potentials from the 1987 sector surface 2, 5, and 15 m positions, respectively, were  $0.6 (\pm 0.1)$ ,  $0.9 (\pm 0.1)$ , and  $0.5 (\pm 0.1) \mu\text{g CO}_2 \text{ g}^{-1} \text{ h}^{-1}$ . The average ( $\pm$  SD) production potentials from the 1987 sector 10 cm depth 2, 5, and 15 m positions, respectively, were  $1.1 (\pm 0.2)$ ,  $0.8 (\pm 0.2)$ , and  $0.5 (\pm 0.1) \mu\text{g CO}_2 \text{ g}^{-1} \text{ h}^{-1}$ . The average ( $\pm$ SD) production potential from the 1987 sector deep samples was the same –  $1.4 (\pm 0.2) \mu\text{g CO}_2 \text{ g}^{-1} \text{ h}^{-1}$  from 2 m, 50 cm depth and  $1.4 (\pm 0.3) \mu\text{g CO}_2 \text{ g}^{-1} \text{ h}^{-1}$  from 15 m, 80 cm depth. The average ( $\pm$  SD) production potentials from the 2007 sector surface 2, 5, and 15 m positions, respectively, were  $0.7 (\pm 0.1)$ ,  $0.5 (\pm 0.1)$ , and  $0.7 (\pm 0.1) \mu\text{g CO}_2 \text{ g}^{-1} \text{ h}^{-1}$ . The average ( $\pm$  SD) production potentials from the 2007 sector 10 cm depth 2, 5, and 15 m positions, respectively, were  $0.5 (\pm 0.1)$ ,  $0.3 (0.1)$ , and  $0.5 (\pm 0.1) \mu\text{g CO}_2 \text{ g}^{-1} \text{ h}^{-1}$ . The average ( $\pm$  SD) production potentials from the 2007 sector deep samples were  $0.9 (\pm 0.2) \mu\text{g CO}_2 \text{ g}^{-1} \text{ h}^{-1}$  from the 2 m, 50 cm depth and  $0.8 (\pm 0.3) \mu\text{g CO}_2 \text{ g}^{-1} \text{ h}^{-1}$  from the 15 m, 80 cm depth. The average ( $\pm$  SD) production potentials from the 2016 sector surface 2, 5, and 15 m positions, respectively, were  $0.7 (\pm 0.2)$ ,  $0.8 (\pm 0.1)$ , and  $1.4 (\pm 0.2) \mu\text{g CO}_2 \text{ g}^{-1} \text{ h}^{-1}$ . The average ( $\pm$  SD) production potentials from the 2016 sector 10 cm depth 2, 5, and 15 m positions, respectively, were  $0.4 (\pm 0.1)$ ,  $0.5 (\pm 0.1)$ , and  $1.2 (\pm 0.3) \mu\text{g CO}_2 \text{ g}^{-1} \text{ h}^{-1}$ . The average ( $\pm$  SD) production potential from the 2016 sector deep samples were  $0.6 (\pm 0.2) \mu\text{g CO}_2 \text{ g}^{-1} \text{ h}^{-1}$  from 2 m, 50 cm depth and  $0.7 (\pm 0.2) \mu\text{g CO}_2 \text{ g}^{-1} \text{ h}^{-1}$  from 15 m, 80 cm depth.

Carbon dioxide production from the 1987 sector samples did not appear to follow any clear pattern or trend due to the position on the field or depth (Figure 9A). However, statistically, significant differences can be seen among depths of the surface and 10 cm from the 2 and 5 m positions and the 5 and 15 m positions. Carbon dioxide production within the 2007 sector also did not appear to follow a trend or pattern (Figure 9B). Notable statistically significant differences within the 2007 sector emerged at a depth of 10 cm between the 5 and 15 m positions. The 2016 sector samples, however, exhibited a clear increase in  $\text{CO}_2$  production with increasing distance from the drainage ditches at the surface and 10 cm depths (Figure 9C). From these depths, the 2 and 15 m positions and the 5 and 15 m positions were statistically different ( $F_{6,366} = 19.5$ ,  $p < 0.001$ ). From all three sectors,  $\text{CO}_2$  production potentials were similar between the 50 and 80 cm depths, although the absolute values varied between the sectors.

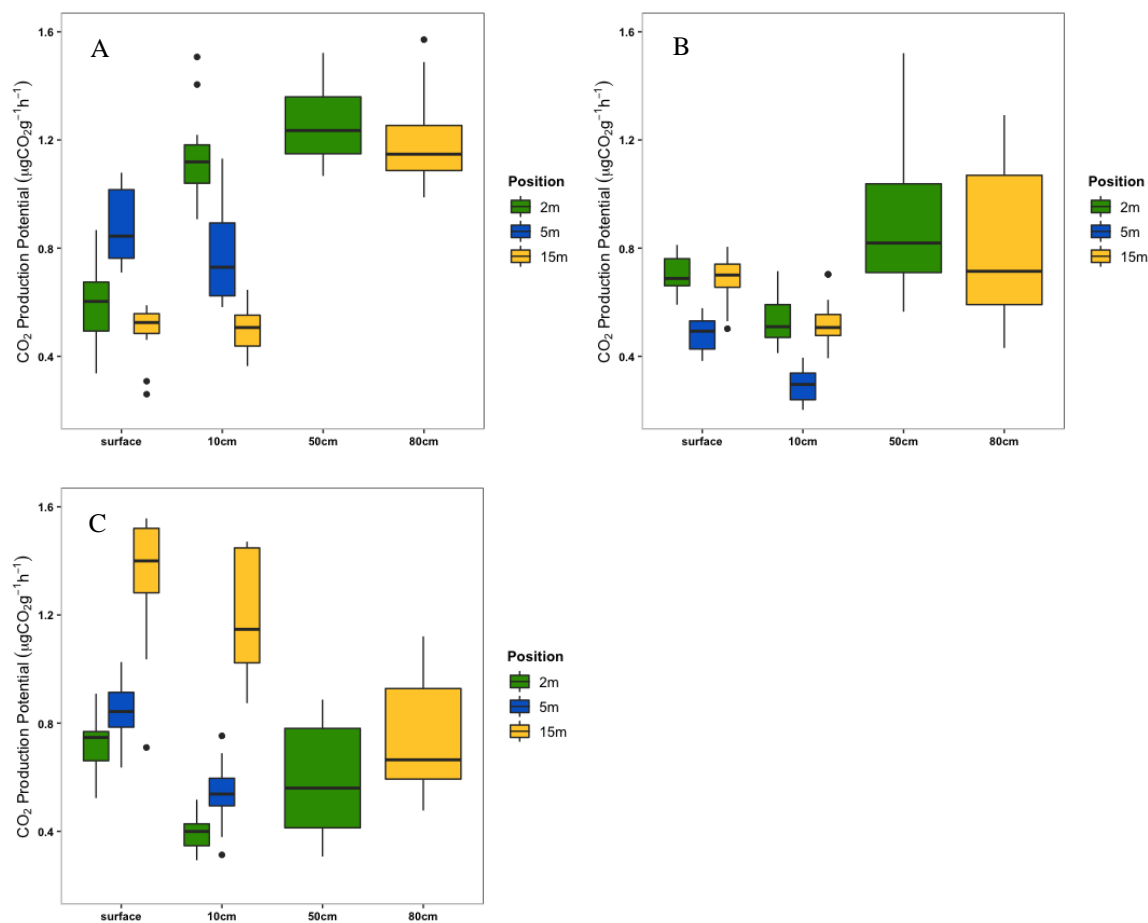

350

Figure 9: CO<sub>2</sub> production potentials of all samples from the A) 1987, B) 2007, and C) 2016 sectors

### 3.4.2 CH<sub>4</sub>

As expected, given the oxic conditions of the incubations, no incubations showed a consistent increase in CH<sub>4</sub> concentration for the experiment, and all CH<sub>4</sub> r<sup>2</sup> values were < 0.8.

355

## 4.0 Discussion

The net ecosystem exchange (NEE) of undisturbed peatlands ranges between -10 to -60 g C m<sup>-2</sup> yr<sup>-1</sup> (Koehler et al., 2010; Roulet et al., 2007; Sagerfors et al., 2008), whereas our study site is a net source of C to the atmosphere, similar to values



reported from disturbed and post-extraction, unrestored peatlands. Aslan-Sungur et al. (2016) reported CO<sub>2</sub> fluxes of 246, 244,  
360 and 663 g C m<sup>-2</sup> yr<sup>-1</sup> in 2011, 2012, and 2013 respectively, from a peatland site, drained for mining and agricultural use. Rankin  
et al. (2018) reported annual CO<sub>2</sub> emissions of 173 - 259 g C m<sup>-2</sup> yr<sup>-1</sup> from a 20-year post-extracted, unrestored peatland. For  
our study site, using the mean daily emission of 0.7 g C m<sup>-2</sup> for six months and ~0.5 g C m<sup>-2</sup> d<sup>-1</sup> for the six coldest months  
would yield an estimate of 200-250 g C m<sup>-2</sup> yr<sup>-1</sup>, which is in line with previous results (Alm et al., 2007; Aslan-Sungur et al.,  
2016; Nykanen et al., 1995; Wilson et al., 2015). 

365 A higher respiration rate from the drainage ditches is consistent with findings from previous studies at post-extraction  
(Waddington et al., 2010) and unrestored (Rankin et al., 2018) peatland sites. The CO<sub>2</sub> emissions from the drainage ditches  
alone are similar in magnitude to emissions from natural peatlands (~12 ± 21 g C m<sup>-2</sup> yr<sup>-1</sup> (Abdalla et al., 2016)).

Our measured CH<sub>4</sub> fluxes correspond to published values from other drained peatland sites (Manning et al., 2019;  
Waddington et al., 1996). Korkiakoski et al. (2020) reported that a drained peatland site in Finland even became a CH<sub>4</sub> sink  
370 over the growing season, measuring atmospheric emissions following precipitation events. Although our site is not a net sink,  
some uptake of CH<sub>4</sub> by the field surface was measured consistently over all three years of study from all sector ages. We likely  
have under-sampled gas fluxes after rainfall events, which may influence temporal variation in CH<sub>4</sub> emissions.

#### 4.1 Environmental Variables

Peat fibre content, indicated by visual analysis and industry specification, does not appear to influence respiration  
375 rates greatly. According to industry quality classification  the 1987 sector contains the most fibric peat, while the 2007 through  
2016 sectors do not vary significantly in fibre content. Thus, the physical characteristic of the peat structure does not predict  
variation in CO<sub>2</sub> production within fields or between sectors. Temperature is widely documented to be a driver of CO<sub>2</sub>  
production (Blodau, 2002; Holden, 2005; Moore & Dalva, 1993; Yavitt et al., 1997); however, surface temperature exerts little  
to no influence over our measured CO<sub>2</sub> flux (r = 0.19). It is possible that other drivers, such as substrate quality, may have a  
380 larger impact on CO<sub>2</sub> emissions. Surface VWC also does not appear to have an influence on CO<sub>2</sub> flux (r = -0.2), possibly due  
to increased respiration rates in the deeper aerated peat that would offset a decline in CO<sub>2</sub> production from desiccation  
(Dimitrov et al., 2010; Marwanto & Agus, 2014; Waddington et al., 2002). Average VWC in the upper 10 cm is lower than



values documented from other disturbed peatlands (Manning et al., 2019; Waddington et al., 2002), but values from actively extracted peatland sites are difficult to find in the literature.

#### 385 4.2 Chamber Measurement CO<sub>2</sub> Fluxes

An expected result was the overarching observation that the most recently opened 2016 sector had higher CO<sub>2</sub> emissions than the older sectors. It can be best explained by the relative age and thus the degree of decomposition of the surface peat. Since this sector was most recently opened, aerated peat in the upper profile is younger than sites where peat extraction has occurred for many years, exposing older peat present deeper in the profile. The range of water table depths across a field from beside the ditch to the centre of the field in the summer are 0.2 to 0.5 and 0.3 to 0.8 m, respectively. The peat water content was between 40 to 50% at 0.1 m below the surface and > 70 to 80% below 0.3 m depth (Lai 2022). Further, the elevation gradient that results from the practice of contouring the field surface exposes older peat deeper in the soil profile to the surface near the ditches, leaving younger peat in the middle of the fields (Figure 8).

Nutrients and microbial biomass have been lost over time in the older sectors as peat at depth is continuously exposed to the surface (Croft et al., 2001; Glatzel et al., 2004). The decrease in CO<sub>2</sub> production could also be a result of an accumulation of inhibitory compounds such as lignins, phenolics, or humic substances, that hinder extracellular enzyme activity (Hogg et al., 1992). This is supported by the HI (1650/1090 cm<sup>-1</sup>), which shows an increase in humification with time since extraction began. In addition, the reduced water contents due to drainage most likely lead to secondary decomposition of the peat in the top 0.3 to 0.5 m of peat in the field undergoing extraction (Biester et al., 2014). In an incubation study of peat samples from 2- and 7-year post-extraction peatlands, Waddington et al. (2001) concluded that CO<sub>2</sub> production did not change from peat below a depth of 35 cm. The authors did not find a significant difference in CO<sub>2</sub> production between the young and old cutover sites and argue that peat age strongly influences CO<sub>2</sub> production more than gas transport through peat layers (Waddington et al., 2001).

Spatial variation within fields further illustrates the effect of peat age on respiration. The site average CO<sub>2</sub> flux is similar to average values from post-extraction, unrestored sites while the 2016 sector 15 m position emits more CO<sub>2</sub> than is recorded in the literature for post-extraction, unrestored sites (Rankin et al., 2018; Strack & Zuback, 2013). The 2016 sector displays a clear linear increase in CO<sub>2</sub> flux with increasing distance from the ditch, but this effect declines and plateaus in the



older sectors. Spatial variation in CO<sub>2</sub> emissions is not apparent in the older extracted sectors because the surface peat is older, and the respiration rates are correspondingly lower. The peat at the 2 m position in the 2016 sector has a similar <sup>14</sup>C age to the  
410 middle of the 2007 sector (Figure 8) and also displays a similar mean CO<sub>2</sub> flux to the 2007 15 m position (0.57 and 0.72 g C m<sup>-2</sup> d<sup>-1</sup> for 2016 and 2007, respectively).

Previous studies have compared trace gas production from natural and cutover peatlands (Croft et al., 2001; Glatzel et al., 2004; Waddington et al., 2001; Waddington et al., 2002; Waddington & Price, 2000); however, none have compared the spatial variation in respiration rates between peat age based on depth and production year at an extracted peatland. Our results  
415 indicate that in the first few years of peat extraction, the residual labile C contained in the surface peat encourages C mineralization and high levels of CO<sub>2</sub> production. This is clearly observed in the high emissions from the center of the youngest field, opened two years prior to our initial measurements. An obvious decline in respiration within the 2016 sector is demonstrated over a distance of 10 m (Figure 5), with an estimated 15 cm difference in depth and an age difference of ~ 450 years, driven by the easily available C consumed by microbes. Over approximately three to four years, based on measurements  
420 from the sector that opened in 2013, respiration rates plateau. Peat quality appears to decline with extraction length, as indicated by the HI (1650/1090 cm<sup>-1</sup>). Soil moisture and temperature, typical drivers of CO<sub>2</sub> production, have a relatively lower influence on respiration rate, further indicating peat age (i.e. peat quality due to secondary decomposition) and corresponding lability to be the primary control.

#### 4.3 Peat Substrate Age and Decomposability

425 The CO<sub>2</sub> production potential from the incubation experiments mirrors those observed in our field chamber fluxes, suggesting that peat samples from the field site behave similarly under field conditions when experimentally controlling for moisture and temperature. In high-latitude peatlands, deeper peat has been shown to be more resistant to decomposition than more recently formed peat (Hogg et al., 1992). Supporting our field measurement results, the CO<sub>2</sub> production potential of incubated peat from the 2016 sector increases with distance from the ditch and decreasing peat age in the top layers of peat  
430 (surface and 10 cm depths; Figure 9C). Increased CO<sub>2</sub> production potential with younger peat supports the conclusion that the 2016 sector contains C in the substrate that is more readily available for decomposition. This is not observed from the older sectors that have undergone extraction for longer durations of time, also in accordance with our field measurements.



Decreased CO<sub>2</sub> production potential from older, lower quality peat is consistent with what has previously been presented in the literature for temperate peatlands. Research has shown that CO<sub>2</sub> production potential declines with depth  
435 (Bridgham & Richardson, 1992; Waddington et al., 2001), helping to explain the consistent behaviour of the deep peat samples from the 2007 and 2016 sectors. This was an expected outcome as these samples were parallel to each other at depth and had similar (within ~100 years) <sup>14</sup>C ages (Figure 9). Research has shown that intra- and inter-community CO<sub>2</sub> production potential from well-humified peat does not vary significantly (Bridgham & Richardson, 1992). McKenzie et al. (1998) reported that CO<sub>2</sub> and CH<sub>4</sub> production potential declined with depth from different locations at two flooded peatland sites, which they  
440 attribute to differences in peat quality as a result of age.

Moreover, previous studies found decreased CO<sub>2</sub> production potential from peat in extracted peatlands compared to natural and restored sites (Croft et al., 2001; Glatzel et al., 2004). Glatzel et al. (2004) observed lower rates of respiration from surface peat at a production site, compared to natural and restored sites, finding the degree of humification, determined by Glatzel, to be an important control on CO<sub>2</sub> production. Waddington et al. (2001) also found that CO<sub>2</sub> production was lower in  
445 block-cut sites compared to a natural peatland and that the most active CO<sub>2</sub> production was in the surface layers. Croft et al. (2001) found lower microbial biomass in a vacuum-harvested production site, leading to lower CO<sub>2</sub> production, and found that microbial populations increased following restoration.

#### 4.4 Chamber CH<sub>4</sub> Fluxes

A measured difference in CH<sub>4</sub> fluxes between the field surface and drainage ditches was an expected outcome, as this  
450 has been demonstrated in many previous studies (Manning et al., 2019; Minkinen et al., 1997; Minkinen & Laine, 2006; Rankin et al., 2018; Schrier-Uijl et al., 2010; Strack & Zuback, 2013; Sundh et al., 2000; Waddington & Day, 2007). The drainage ditches act as localized anoxic zones that exhibit ideal moisture and temperature conditions for CH<sub>4</sub> production. Higher CH<sub>4</sub> fluxes, particularly if standing water is present, from the drainage ditches, could be explained by microbial breakdown of dissolved organic carbon (DOC) or the lateral transport of dissolved CH<sub>4</sub> produced in the anoxic peat field layers  
455 (Billett & Moore, 2008; Teh et al., 2011; Cory et al., 2014; Logue et al., 2016).

The lack of correlation between surface soil moisture and CH<sub>4</sub> emissions was a surprising and unanticipated outcome. Drainage has been documented to decrease CH<sub>4</sub> emissions (Abdalla et al., 2016; Basiliko et al., 2007; Korkeakoski et al., 2020;





Waddington & Price, 2000), but soil moisture is widely accepted to have a significant influence on CH<sub>4</sub> emissions (e.g. Abdalla et al., 2016; Basiliko et al., 2007; Manning et al., 2019; Moore & Dalva, 1993; Moore & Roulet, 1993). VWC measurements  
460 likely do not correlate with CH<sub>4</sub> flux as they were taken in the surface peat that is disconnected from the moisture profile as a result of harrowing.

WTD measurements taken from June 2019 through August 2020 by Lai (2022) indicate that during the summer months, the WT decreases toward the edge of the field, measuring approximately 0.6 m from the surface at a distance of 1 m from the ditches, due to the drainage of water into the base of the drainage ditches. Between June and October, at a distance  
465 of ~ 13.5 m away from the drainage ditches, the WT remained at ~ 0.8 m below the surface, except after a few large rain events. The peat water content above the water table in the field centre ranged from ~50% at 0.1 m depth below the surface to >70 to 80% at 0.3 m depth. These measurements indicate little difference in the potential oxidation path length from the field edge to the centre, further supporting our assertion that peat age is the primary control over CO<sub>2</sub> production.

Vegetation removal also plays a role in the decline of CH<sub>4</sub> transmission to the atmosphere compared to natural or  
470 restored sites. The absence of vegetation removes the input of labile C to the anoxic layer usually facilitated by sedge roots in natural peatlands (Joabsson et al., 1999; Dorodnikov et al., 2011) and the transport of CH<sub>4</sub> to the surface via vascular plants ceases (Korkiakoski et al., 2020).

Our results indicate that the field surfaces from all sectors are not significant sources of CH<sub>4</sub> to the atmosphere. At the same time, the drainage ditches produce almost seven times more CH<sub>4</sub> on average (9.2 and 72.0 mg C m<sup>-2</sup> d<sup>-1</sup> for the field  
475 and drainage ditches, respectively). Ultimately, no other significant trends or correlating variables were found to explain variation in our measured CH<sub>4</sub> fluxes. Additional measurements, such as flux measurements after precipitation events, may help explain the drivers of CH<sub>4</sub> emissions at this site.

## 5. Summary and Conclusion

We were able to determine that peatlands undergoing active peat extraction are net sources of C to the atmosphere,  
480 with average CO<sub>2</sub> and CH<sub>4</sub> flux values similar to those of post-extraction, unrestored peatland sites. The newly opened sectors are significantly higher sources of CO<sub>2</sub> to the atmosphere, and fluxes decline over several years to become consistent sources



over the remaining period of extraction. The spatial-age effect across the domed fields, where CO<sub>2</sub> emissions increase with increasing distance from the drainage ditches, also declines and plateaus. CH<sub>4</sub> emissions do not appear to exhibit a clear spatial or temporal pattern between sector ages or measurement positions, although lower CH<sub>4</sub> fluxes are observed from the centre of the peat fields. The drainage ditches are sources of CH<sub>4</sub> to the atmosphere, while the field surfaces do not show large amounts of CH<sub>4</sub> production. In the fields of this study, the ditch spacing was every 30 m, so the ratio of the ditch to field surface area was ~15:1. The CO<sub>2</sub> from the fields and ditches was not substantially different, so the two surfaces' contribution was proportional to their area in a sector (e.g. fields and ditches contributed 92 to 8% to the overall flux from a sector). Conversely, the CH<sub>4</sub> was significantly greater for ditches than fields, so the ditches emitted disproportionately more CH<sub>4</sub> than their relative area (fields emitted 65% and ditches 35% of all CH<sub>4</sub> from a sector). Laboratory incubations did not show a significant level of CH<sub>4</sub> production potential from the peat samples, at an estimated 80-90 % moisture content. Under constant moisture and temperature conditions, the CO<sub>2</sub> production potential of peat from the 1987, 2007, and 2016 sector ages displayed the same behaviour as CO<sub>2</sub> emissions under field conditions. CO<sub>2</sub> production potential increased with distance from the ditch from the top peat layers in the youngest 2016 sector, but this pattern was not displayed from the older 1987 or 2007 sectors. CO<sub>2</sub> production potential of peat samples at depths of 50 and 80 cm was similar between all three sector ages, although a significant amount of variation was observed between the sector age. Peat age, which appears to be a good indicator of quality difference, was determined to be the primary driver of CO<sub>2</sub> production across the field width and sectors.

The quantification of C emissions from these sites allows for more accurate estimates of peat production's overall impact on atmospheric C accumulation. The results of this study provide the industry with scalable numbers of CO<sub>2</sub> and CH<sub>4</sub> production to determine potential mitigation tactics and move forward with the continued sustainable and responsible management of this resource.

### Author Contributions

LC was responsible for the collection of the field and laboratory data, analysis and the initial draft preparation; IBS was the primary supervisor of LC, reviewed and edited the manuscript and contributed to the methodological design; MS was co-supervisor of LC, reviewed and edited the manuscript and contributed to the methodological design; NTR reviewed and edited



the manuscript, contributed to the methodological design and is the PI on the project that funded the study. KHK and HT contributed to laboratory analyses and FT-MIR data evaluation and reviewed and edited the manuscript.

### Competing Interests

The authors declare that they have no conflict of interest.

### 510 Acknowledgements

This research funded through a Collaborative Research and Development (CRDJ 525896-18) grant to NTR, IBS and MS from the Natural Sciences and Engineering Research Council (NSERC) of Canada, the Canadian Sphagnum Peat Moss Association (CSPMA), and several Canadian peat companies (Berger Peat Moss Lrd., Lambert Peat Moss, Premier Tech. Scotts Canada, and Sun Gro Horticulture Canada). The authors wish to thank the operations staff at Premier Tech Horticulture (PTH) for  
515 facilitating access to the field site and Dr. Frédéric Caron and Dr. Pierre-Olivier Jean of PTH for their scientific discussions. Field and lab assistance was provided by Naomi Weinberg, Madison Meades, Karina Volpato, Maria Ghetta, Isabel Strachan, Jan Bahrke, Hedda Lil Müller, and Mike Dalva.

### References

Abdalla, M., Hastings, A., Truu, J., Espenberg, M., Mander, Ü., and Smith, P.: Emissions of methane from northern peatlands:  
520 A review of management impacts and implications for future management options, *Ecol. Evol.*, 6(19), 7080-7102, doi:10.1002/ece3.2469, 2016.

Ahlholm, U., and Silvola, J.: CO<sub>2</sub> release from peat-harvested peatlands and stockpiles, *Proceedings of PEAT 90 versatile peat, International Conference on Peat Production and Use*, 2, 1990.

525



Alm, J., Shurpali, N. J., Minkkinen, K., Aro, L., Hytönen, J., Laurila, T., and Mäkiranta, P.: Emission factors and their uncertainty for the exchange of CO<sub>2</sub>, CH<sub>4</sub> and N<sub>2</sub>O in Finnish managed peatlands, *Boreal Environ. Res.*, 12, 191-209, 2007.

Armentano, T., and Menges, E.: Patterns of change in the carbon balance of organic soil-wetlands of the temperate zone, *J.*

530 *Ecol.*, 74, 755-774, doi:10.2307/2260396, 1986.

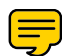

Aslan-Sungur, G., Lee, X., Evrendilek, F., and Karakaya, N.: Large interannual variability in net ecosystem carbon dioxide exchange of a disturbed temperate peatland, *Sci. Total Environ.*, 554, 192-202, doi:10.1016/j.scitotenv.2016.02.153, 2016.

535 Basiliko, N., Blodau, C., Roehm, C., Bengtson, P., and Moore, T. R.: Regulation of decomposition and methane dynamics across natural, commercially mined, and restored northern peatlands, *Ecosys.*, 10(7), 1148-1165, doi:10.1007/s10021-007-9083-2, 2007.

540 Bergman, I., Svensson, B. H., and Nilsson, M.: Regulation of methane production in a Swedish acid mire by pH, temperature and substrate, *Soil Biol. Biochem.*, 30(6), 729-741, doi:10.1016/S0038-0717(97)00181-8, 1998.

Biester, H., K. H. Knorr, J. Schellekens, A. Basler and Hermanns, YM: Comparison of different methods to determine the degree of peat decomposition in peat bogs, *Biogeosciences* 11(10): 2691-2707, 2014.

545 Billett, M., and Moore, T.: Supersaturation and evasion of CO<sub>2</sub> and CH<sub>4</sub> in surface waters at Mer Bleue peatland, Canada, *Hydrol. Processes*, 22(12), 2044-2054, doi.org/10.1002/hyp.6805, 2008.

Blodau, C.: Carbon cycling in peatlands A review of processes and controls, *Environ. Rev.*, 10(2), 111-134, 2002.



550 Bridgman, S. D., and Richardson, C. J.: Mechanisms controlling soil respiration (CO<sub>2</sub> and CH<sub>4</sub>) in southern peatlands, *Soil Biol. Biochem.*, 24, 1089-1099, doi.org/10.1016/0038-0717(92)90058-6, 1992.

Broder, T., Blodau, C., Biester, H., and Knorr, K.-H.: Peat decomposition records in three pristine ombrotrophic bogs in southern Patagonia, *Biogeosci.*, 9(4), 1479-1491, 2012.

555

Ramsey, C. B.: Bayesian analysis of radiocarbon date, *Radiocarbon* 51(1): 337-360, 2009.

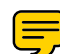

Bubier, J. L., Bhatia, G., Moore, T. R., Roulet, N. T., and Lafleur, P. M.: Spatial and temporal variability in growing-season net ecosystem carbon dioxide exchange at a large peatland in Ontario, Canada, *Ecosys.*, 6, 353-367, 2003.

560

Bubier, J. L., Moore, T. R., Bellisario, L., Comer, N. T., and Crill, P. M.: Ecological controls on methane emissions from a northern peatland complex in the zone of discontinuous permafrost, Manitoba, Canada, *Global Biogeochem. Cycles*, 9(4), 455-470, doi:10.1029/95GB02379, 1995.

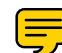

565 Bubier, J., Moore, T., and Roulet, N.: Methane emissions from wetlands in the mid-boreal region of northern Ontario, Canada, *Ecology*, 74(8), 2240-2254, 1993.

Bubier, J., Moore, T., Savage, K., and Crill, P.: A comparison of methane flux in a boreal landscape between a dry and a wet year, *Global Biogeochem. Cycles*, 19(1), doi:10.1029/2004GB002351, 2005.

570

Cory, R. M., Ward, C. P., Crump, B. C., and Kling, G. W.: Sunlight controls water column processing of carbon in arctic fresh waters, *Science*, 345(6199), 925-928, doi:10.1126/science.1253119, 2014.



Croft, M., Rochefort, L., and Beauchamp, C. J.: Vacuum-extraction of peatlands disturbs bacterial population and microbial  
575 biomass carbon, *Appl. Soil Ecol.*, 18(1), 1-12, doi:10.1016/S0929-1393(01)00154-8, 2001.

Dorodnikov, M., Knorr, K.H., Kuzyakov, Y., and Wilmking, M.: Plant-mediated CH<sub>4</sub> transport and contribution of  
photosynthates to methanogenesis at a boreal mire: a <sup>14</sup>C pulse-labeling study, *Biogeosci.*, 8, 2365-2375, 2011.

580 Dimitrov, D. D., Grant, R. F., Lafleur, P. M., and Humphreys, E. R.: Modeling the effects of hydrology on ecosystem  
respiration at Mer Bleue bog, *J. Geophys. Res.: Biogeosci.*, 115(G04043), doi.org/10.1029/2010JG001312, 2010.

Environment and Climate Change Canada: Canadian Climate Normals 1981 – 2010 Station Data,  
[https://climate.weather.gc.ca/climate\\_normals/results\\_1981\\_2010\\_e.html](https://climate.weather.gc.ca/climate_normals/results_1981_2010_e.html), 2021.

585

Glatzel, S., Basiliko, N., and Moore, T.: Carbon dioxide and methane production potentials of peats from natural, harvested  
and restored sites, eastern Québec, Canada, *Wetlands*, 24(2), 261-267, 2004.

Hiraishi, T., Krug, T., Tanabe, K., Srivastava, N., Baasansuren, J., Fukuda, M., and Troxler, T.: 2013 supplement to the 2006  
590 IPCC guidelines for national greenhouse gas inventories: Wetlands, IPCC, Switzerland, 2014.

Hogg, E. H., Lieffers, V. J., and Wein, R. W.: Potential carbon losses from peat profiles: effects of temperature, drought cycles,  
and fire, *Ecolog. Appl.*, 2(3), 298-306, 1992.

595 Holden, J.: Peatland hydrology and carbon release: why small-scale process matters, *Phil. Trans. Royal Soc. A*, 363(1837),  
2891-2913, doi:10.1098/rsta.2005.1671, 2005.



- Joabsson, A., Christensen, T. R., and Wallén, B.: Vascular plant controls on methane emissions from northern peat forming wetlands, *Trends in Ecology & Evolution*, 14(10), 385-388, 1999.
- 600
- Joosten, H., and Clarke, D.: Wise use of mires and peatlands. In: International Mire Conservation Group and International Peat Society, 304pp, 2002.
- Killham, K.: *Soil Ecology*, Cambridge University Press, Cambridge, UK, 1994.
- 605
- Koehler, A. K., Sottocornola, M., and Kiely, G.: How strong is the current carbon sequestration of an Atlantic blanket bog?, *Global Change Biol.*, 17(1), 309-319, 2011.
- Korkiakoski, M., Ojanen, P., Penttilä, T., Minkkinen, K., Sarkkola, S., Rainne, J., . . . and Lohila, A.: Impact of partial harvest on CH<sub>4</sub> and N<sub>2</sub>O balances of a drained boreal peatland forest, *Agric. For. Meteorol.*, 295, 108168, doi.org/10.1016/j.agrformet.2020.108168, 2020.
- 610
- Lafleur, P. M.: Connecting atmosphere and wetland: trace gas exchange, *Geography Compass*, 3(2), 560-585, doi:10.1111/j.1749-8198.2008.00212.x, 2009.
- 615
- Lafleur, P. M.: Interannual variability in the peatland-atmosphere carbon dioxide exchange at an ombrotrophic bog, *Global Biogeochem. Cycles*, 17, 1036-1050, doi.org/10.1029/2002GB001983, 2003
- Lai, Oi Yin: Peat Moisture and Thermal Regimes for Peatlands Undergoing Active Extraction, M.Sc. Thesis, Department of
- 620 Geography, McGill University, 65 pp, 2022.



- Limpens, J., Berendse, F., Blodau, C., Canadell, J., Freeman, C., Holden, J., and Schaepman-Strub, G.: Peatlands and the carbon cycle: from local processes to global implications—a synthesis, *Biogeosci.*, 5(5), 1475-1491, 2008.
- 625 Logue, J. B., Stedmon, C. A., Kellerman, A. M., Nielsen, N. J., Andersson, A. F., Laudon, H., and Kritzberg, E. S.: Experimental insights into the importance of aquatic bacterial community composition to the degradation of dissolved organic matter, *ISME J.*, 10, 533–545, doi.org/10.1038/ismej.2015.131, 2016.
- Lundegardh, H.: Carbon dioxide evolution of soil and crop growth, *Soil Sci.*, 23(6), 417-453, Retrieved from  
630 [https://journals.lww.com/soilsci/Fulltext/1927/06000/CARBON\\_DIOXIDE\\_EVOLUTION\\_OF\\_SOIL\\_AND\\_CROP\\_GROWTH.1.aspx](https://journals.lww.com/soilsci/Fulltext/1927/06000/CARBON_DIOXIDE_EVOLUTION_OF_SOIL_AND_CROP_GROWTH.1.aspx), 1927.
- Manning, F. C., Kho, L. K., Hill, T. C., Cornulier, T., and Teh, Y. A.: Carbon emissions from oil palm plantations on peat soil, *Frontiers in Forests and Global Change*, 2, doi.org/10.3389/ffgc.2019/00037, 2019.
- 635 Marwanto, S., and Agus, F.: Is CO<sub>2</sub> flux from oil palm plantations on peatland controlled by soil moisture and/or soil and air temperatures? *Mitigation and Adaptation Strategies for Global Change*, 19(6), 809-819, 2014.
- McKenzie, C., Schiff, S., Aravena, R., Kelly, C., and St. Louis, V.: Effect of temperature on production of CH<sub>4</sub> and CO<sub>2</sub> from  
640 peat in a natural and flooded boreal forest wetland, *Climatic Change*, 40, 247-266, 1998.
- McNeil, P., and Waddington, J.: Moisture controls on Sphagnum growth and CO<sub>2</sub> exchange on a cutover bog, *J. Appl. Ecol.*, 40(2), 354-367, doi:10.1046/j.1365-2664.2003.00790.x, 2003.
- 645 Minkinen, K., and Laine, J.: Vegetation heterogeneity and ditches create spatial variability in methane fluxes from peatlands drained for forestry, *Plant and Soil*, 285(1), 289-304, 2006.





- 650 Minkkinen, K., Laine, J., Nykänen, H., and Martikainen, P. J.: Importance of drainage ditches in emissions of methane from mires drained for forestry, *Can. J. For. Res.*, 27(6), 949-952, 1997.
- Moore, T., and Dalva, M.: The influence of temperature and water table position on carbon dioxide and methane emissions from laboratory columns of peatland soils, *Eur. J. Soil Sci.*, 44, 651-664, doi.org/10.1111/j.1365-2389.1993.tb02330.x, 1993.
- 655 Moore, T., Heyes, A., and Roulet, N. T.: Methane emissions from wetlands, southern Hudson Bay lowland, *J. Geophys. Res.: Atmospheres*, 99(D1), 1455-1467, doi:10.1029/93JD02457, 1994.
- Moore, T., and Roulet, N.: Methane flux: water table relations in northern wetlands, *Geophys. Res. Lett.*, 20(7), 587-590, doi:10.1029/93GL00208, 1993.
- 660 Moore, T., Roulet, N., and Knowles, R.: Spatial and temporal variations of methane flux from subarctic/northern boreal fens, *Global Biogeochem. Cycles*, 4(1), 29-46, doi:10.1029/GB004i001p00029, 1990.
- Nugent, K. A., Strachan, I. B., Strack, M., Roulet, N. T., and Rochefort, L.: Multi-year net ecosystem carbon balance of a restored peatland reveals a return to carbon sink, *Global Change Biol.*, 24(12), 5751-5768, 2018.
- 665 Nykanen, H., Alm, J., Lang, K., Silvola, J., and Martikainen, P. J.: Emissions of CH<sub>4</sub>, N<sub>2</sub>O and CO<sub>2</sub> from a virgin fen and a fen drained for grassland in Finland, *J. Biogeography*, 351-357, 1995.
- Oleszczuk, R., Regina, K., Szajdak, L., Höper, H., and Maryganova, V.: Impacts of Agricultural Utilization of Peat Soils on the Greenhouse Gas Balance. In: *Peatlands and Climate Change*, M. Strack (ed.), p.70-97, 2008.
- 670



- Pelletier, L., Garneau, M., and Moore, T.: Variation in CO<sub>2</sub> exchange over three summers at microform scale in a boreal bog, Eastmain region, Québec, Canada, *J. Geophys. Res.: Biogeosci.*, 116(G3), doi:10.1029/2011JG001657, 2011.
- 675 Pelletier, L., Moore, T., Roulet, N., Garneau, M., and Beaulieu-Audy, V.: Methane fluxes from three peatlands in the La Grande Riviere watershed, James Bay lowland, Canada, *J. Geophys. Res.: Biogeosci.*, 112(G1), doi:10.1029/2006JG000216, 2007.
- R Core Team : A language and environment for statistical computing, R Foundation for Statistical Computing, Vienna, Austria,  
680 2021.
- Rankin, T., Strachan, I., and Strack, M.: Carbon dioxide and methane exchange at a post-extraction, unrestored peatland, *Ecolog. Eng.*, 122, 241-251, doi:10.1016/j.ecoleng.2018.06.021, 2018.
- 685 Reimer, P. J., W. E. N. Austin, E. Bard, A. Bayliss, P. G. Blackwell, C. Bronk Ramsey, M. Butzin, H. Cheng, R. L. Edwards, M. Friedrich, P. M. Grootes, T. P. Guilderson, I. Hajdas, T. J. Heaton, A. G. Hogg, K. A. Hughen, B. Kromer, S. W. Manning, R. Muscheler, J. G. Palmer, C. Pearson, J. van der Plicht, R. W. Reimer, D. A. Richards, E. M. Scott, J. R. Southon, C. S. M. Turney, L. Wacker, F. Adolphi, U. Büntgen, M. Capano, S. M. Fahrni, A. Fogtmann-Schulz, R. Friedrich, P. Köhler, S. Kudsk, F. Miyake, J. Olsen, F. Reinig, M. Sakamoto, A. Sookdeo and Talamo, S.:The IntCal20 Northern Hemisphere Radiocarbon  
690 Age Calibration Curve (0–55 cal kBP), *Radiocarbon* 62(4): 725-757, 2020.Rosenberry, D. O., Glaser, P. H., Siegel, D. I., and Weeks, E. P.: Use of hydraulic head to estimate volumetric gas content and ebullition flux in northern peatlands, *Water Resour. Res.*, 39(3), doi:10.1029/2002WR001377, 2003.
- Roulet, N. T., Crill, P., Comer, N., Dove, A., and Boubonniere, R.: CO<sub>2</sub> and CH<sub>4</sub> flux between a boreal beaver pond and the  
695 atmosphere, *J. Geophys. Res.: Atmospheres*, 102(D24), 29313-29319, doi:10.1029/97JD01237, 1997.



- Roulet, N. T., Lafleur, P. M., Richard, P. J., Moore, T. R., Humphreys, E. R., and Bubier, J.: Contemporary carbon balance and late Holocene carbon accumulation in a northern peatland, *Global Change Biol.*, 13(2), 397-411, 2007.
- 700 Sagerfors, J., Lindroth, A., Grelle, A., Klemetsson, L., Weslien, P., and Nilsson, M.: Annual CO<sub>2</sub> exchange between a nutrient-poor, minerotrophic, boreal mire and the atmosphere, *J. Geophys. Res.: Biogeosci.*, 113(G1), 2008.
- Schlesinger, W. H., and Andrews, J. A.: Soil respiration and the global carbon cycle, *Biogeochem.*, 48(1), 7-20, 2000.
- 705 Schrier-Uijl, A., Kroon, P., Hensen, A., Leffelaar, P., Berendse, F., and Veenendaal, E.: Comparison of chamber and eddy covariance-based CO<sub>2</sub> and CH<sub>4</sub> emission estimates in a heterogeneous grass ecosystem on peat, *Agricul. For. Meteorol.*, 150(6), 825-831, doi:10.1016/j.agrformet.2009.11.007, 2010.
- Segers, R.: Methane production and methane consumption: a review of processes underlying wetland methane fluxes, *Biogeochem.*, 41(1), 23-51, 1998.
- 710 Smith P., Bustamante, M., Ahammad, H., Clark, H., Dong, H., ... and Tubiello, F.: Agriculture, Forestry and Other Land Use (AFOLU). In: *Climate Change 2014: Mitigation of Climate Change. Contribution of Working Group III to the Fifth Assessment Report of the Intergovernmental Panel on Climate Change*, Edenhofer, O., et al. (eds.), Cambridge University Press, Cambridge, United Kingdom and New York, NY, USA, 2014.
- Strachan, I. B., Pelletier, L., and Bonneville, M.-C.: Inter-annual variability in water table depth controls net ecosystem carbon dioxide exchange in a boreal bog, *Biogeochem.*, 127(1), 99-111, doi:10.1007/s10533-015-0170-8, 2016.
- 720 Strack, M., Waddington, J., Turetsky, M., Roulet, N., and Byrne, K.: Northern Peatlands, Greenhouse Gas Exchange and Climate Change. In: *Peatlands and Climate Change*, Strack M. (ed) pp 44-69, 2008.



- 725 Strack, M., and Zuback, Y.: Annual carbon balance of a peatland 10 yr following restoration, *Biogeosci.*, 10(5), 2885-2896, doi:10.5194/bg-10-2885-2013, 2013.
- Sundh, I., Nilsson, M., Mikkilä, C., Granberg, G., and Svensson, B. H.: Fluxes of methane and carbon dioxide on peat-mining areas in Sweden, *AMBIO: J. Human Environ.*, 29(8), 499-503, 2000.
- 730 Teh, Y. A., Silver, W. L., Sonnentag, O., Detto, M., Kelly, M., and Baldocchi, D. D.: Large greenhouse gas emissions from a temperate peatland pasture, *Ecosystems*, 14(2), 311-325, 2011.
- Teickner, H., and Hodgkins, S. B. : irpeat: Simple functions to analyse mid infrared spectra of peat samples, 2021.
- 735 Turetsky, M. R., Kotowska, A., Bubier, J., Dise, N. B., Crill, P., Hornibrook, E. R., . . . Nykänen, H.: A synthesis of methane emissions from 71 northern, temperate, and subtropical wetlands, *Global Change Biol.*, 20(7), 2183-2197, doi:10.1111/gcb.12580, 2014.
- Updegraff, K., Pastor, J., Bridgham, S. D., and Johnston, C. A.: Environmental and substrate controls over carbon and nitrogen mineralization in northern wetlands, *Ecological Appl.*, 5(1), 151-163, doi:10.2307/1942060, 1995.
- 740 Valentine, D. W., Holland, E. A., and Schimel, D. S.: Ecosystem and physiological controls over methane production in northern wetlands, *J. Geophys. Res.: Atmospheres*, 99(D1), 1563-1571, doi:10.1029/93JD00391, 1994.
- Waddington, J., and Day, S.: Methane emissions from a peatland following restoration, *J. Geophys. Res.: Biogeosci.*, 112(G3), 745 2007.



Waddington, J. M., Plach, J., Cagampan, J. P., Lucchese, M., and Strack, M.: Reducing the carbon footprint of Canadian peat extraction and restoration, *AMBIO: J. Human Environ.*, 38(4), 194-200, doi:10.1579/0044-7447-38.4194, 2009.

750 Waddington, J., Rotenberg, P., and Warren, F.: Peat CO<sub>2</sub> production in a natural and cutover peatland: implications for restoration, *Biogeochem.*, 54(2), 115-130, 2001.

Waddington, J., and Roulet, N.: Carbon balance of a boreal patterned peatland, *Global Change Biol.*, 6(1), 87-97, 2000.

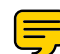

755 Waddington, J., Roulet, N., and Swanson, R.: Water table control of CH<sub>4</sub> emission enhancement by vascular plants in boreal peatlands, *J. Geophys. Res.: Atmospheres*, 101(D17), 22775-22785, 1996.

Waddington, J., Strack, M., and Greenwood, M.: Toward restoring the net carbon sink function of degraded peatlands: Short-term response in CO<sub>2</sub> exchange to ecosystem-scale restoration, *J. Geophys. Res.: Biogeosci.*, 115(G1), 2010.

760

Waddington, J., Warner, K., and Kennedy, G.: Cutover peatlands: a persistent source of atmospheric CO<sub>2</sub>, *Global Biogeochemical Cycles*, 16(1), 1-7, doi:10.1029/2001GB001298, 2002.

765 Wardle, D. A., Bardgett, R. D., Klironomos, J. N., Setälä, H., Van Der Putten, W. H., and Wall, D. H.: Ecological linkages between aboveground and belowground biota, *Science*, 304(5677), 1629-1633, 2004.

Whalen, S.: Biogeochemistry of methane exchange between natural wetlands and the atmosphere, *Environ. Eng. Sci.*, 22(1), 73-94, doi:10.1089/ees.2005.22.73, 2005.

770 Wickham, H.: *ggplot2 : Elegant Graphics for Data Analysis*, Springer-Verlag, New York, 2016.

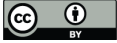

Wilson, D., Dixon, S., Artz, R., Smith, T., Evans, C., Owen, H., and Renou-Wilson, F.: Derivation of greenhouse gas emission factors for peatlands managed for extraction in the Republic of Ireland and the United Kingdom, *Biogeosci.*, 12(18), 5291-5308, 2015.

775

Yavitt, J.B., and Seidmann-Zager, M., Methanogenic conditions in northern peat soils, *Geomicrobiol. J.*, 23, 119-127, 2006.

Yavitt, J. B., Williams, C. J., and Wieder, R. K.: Production of methane and carbon dioxide in peatland ecosystems across North America: Effects of temperature, aeration, and organic chemistry of peat, *Geomicrobiol. J.*, 14, 299-316,

780 [doi.org/10.1080/01490459709378054](https://doi.org/10.1080/01490459709378054), 1997.

Yu, Z.: Northern peatland carbon stocks and dynamics: a review, *Biogeosci.*, 9(10), 4071-4085, doi:10.5194/bg-9-4071-2012, 2012.

785
